# Supplementary material
Source: PubMed Central journal article supplement (PMC5074620)
Supplement: supp_pp.16.00977_00977suppdata.pdf [file supp_pp.16.00977_00977suppdata.pdf]

## **Plant Physiology Supporting Information**

Article title: ***Photoperiod-H1 (Ppd-H1) controls leaf size in barley***

Authors: **Benedikt Digel, Elahe Tavakol, Gabriele Verderio, Alessandro Tondelli, Xu X, Luigi Cattivelli, Laura Rossini, Maria von Korff**

The following Supporting Information is available for this article:

**Fig. S1.** Principal component analysis (PCA) plot based on the first two principal axes with spring and facultative genotypes and *Ppd-H1* variants indicated in colour.

**Fig. S2.** Intra-chromosomal LD decay of markers pairs over all chromosomes as a function of genetic distance.

**Fig. S3.** Manhattan plots of GWAS for flowering date (FD), leaf length (LL) and leaf width (LW) calculated for Iran and Italy separately.

**Fig. S4.** Manhattan plots of GWAS for leaf length (LL) and leaf width (LW) with flowering time (FD) as a covariate.

**Fig. S5.** Size and flanking markers of *Ppd-H1* introgressions in three independent introgression lines.

**Fig. S6.** Heading date is delayed in the presence of the mutated *ppd-H1* allele under LDs.

**Fig. S7.** Leaf length and leaf emergence of Bowman/BW281 and Triumph/Triumph-IL.

**Fig. S8.** Variation at *Ppd-H1* does not affect the rate of leaf elongation.

**Fig. S9.** Leaf blade anatomy of the 5<sup>th</sup> leaf emerging from the main shoot of SD grown plants.

**Fig. S10.** Variance explained by the first 10 principal components for the genetic diversity of the winter barley collection.

**Table S1** Analysis of variance for flowering date (FD), leaf width (LW) and leaf length (LL).

**Table S2.** Genetic material and genotyping information **[provided as Excel table]**

**Table S3.** *Ppd-H1* haplotypes in the introgression lines

**Table S4.** Variation at *Ppd-H1* affects the phyllochron

**Table S5.** Variation at *Ppd-H1* does not affect the rate of leaf blade elongation

**Table S6.** Primers used for genotyping and Real Time qRT-PCR assays

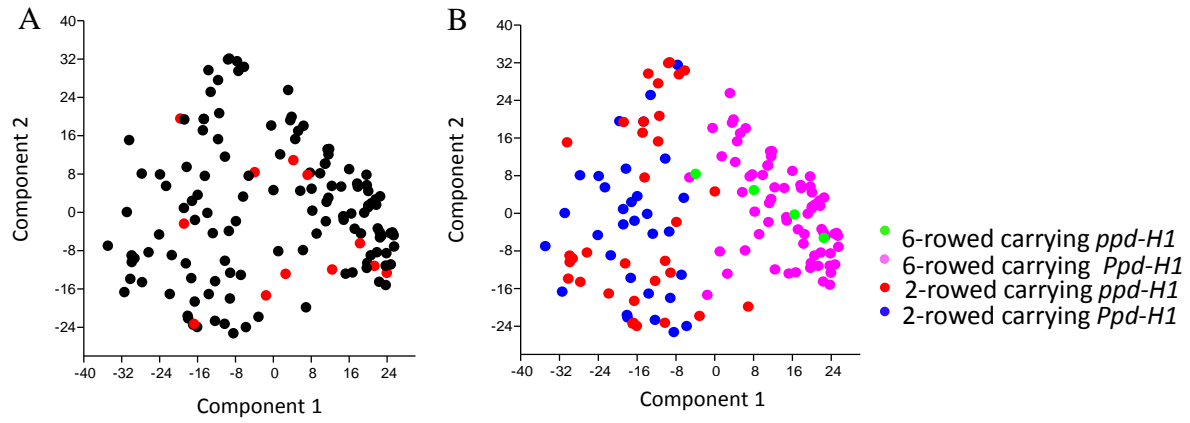

**Fig. S1** Principal component analysis (PCA) plot of 138 barley cultivars based on the first two principal axes (component 1 = 12% and component 2 = 8%). A) Genotypes with a spring *Vrn-H1* allele or a deletion of the *Vrn-H2* locus are indicated in red. B) Genotypes are coloured according to row-type and *Ppd-H1* allele.

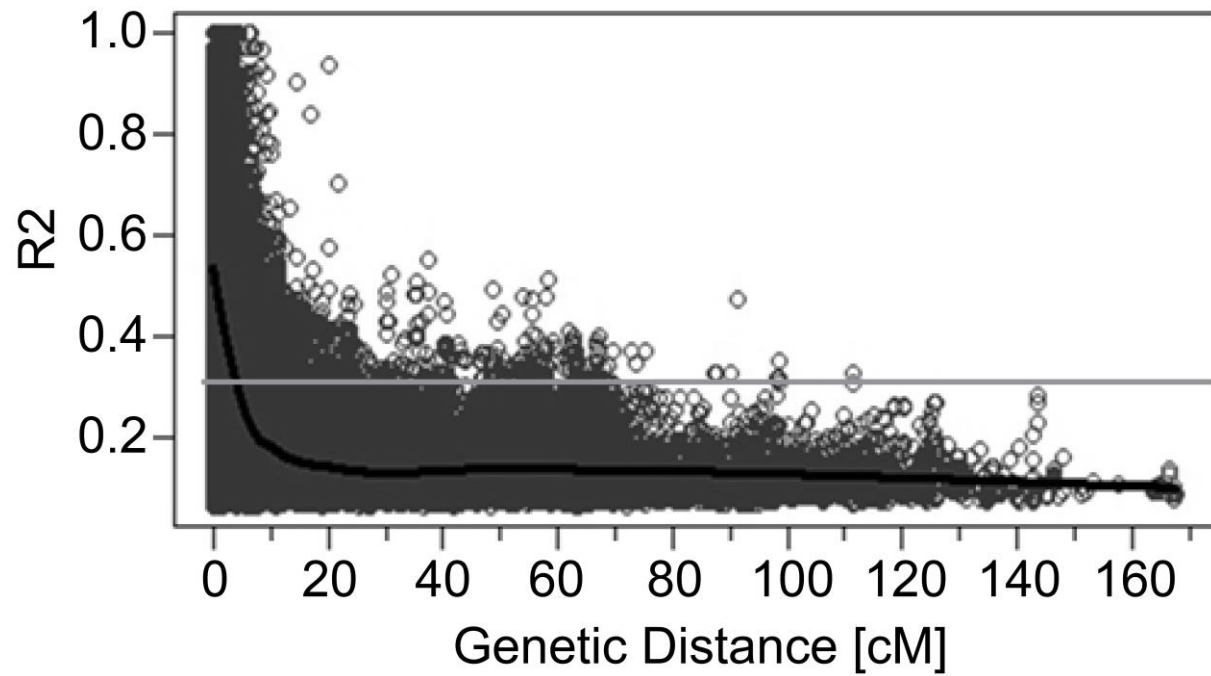

**Fig. S2** Intra-chromosomal LD decay of markers pairs over all chromosomes as a function of genetic distance. The fitted LOESS curve (black line) illustrates the LD decay, and the horizontal line represents the critical  $r^2$  value

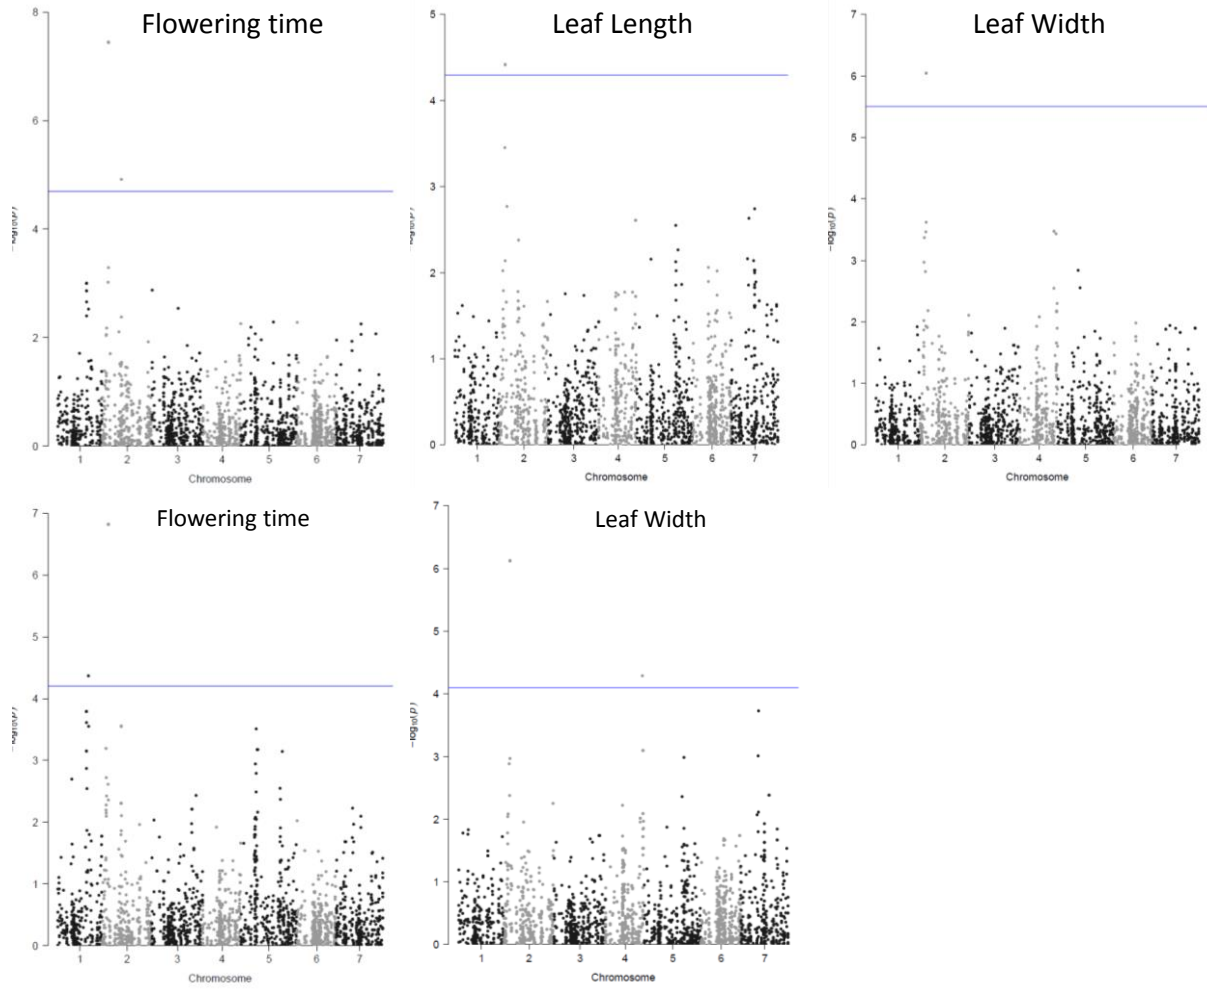

**Fig. S3** Manhattan plots of GWAS for flowering date (FD), leaf length (LL) and leaf width (LW) scored in Iran (upper panel) and in Italy (lower panel) in the barley cultivar collection. The  $-\log_{10}$  (p-values) from the association scans are plotted against the SNP marker positions on each of the seven barley chromosomes. The dashed horizontal line indicates the genome-wide significance threshold at  $FDR < 0.05$ .

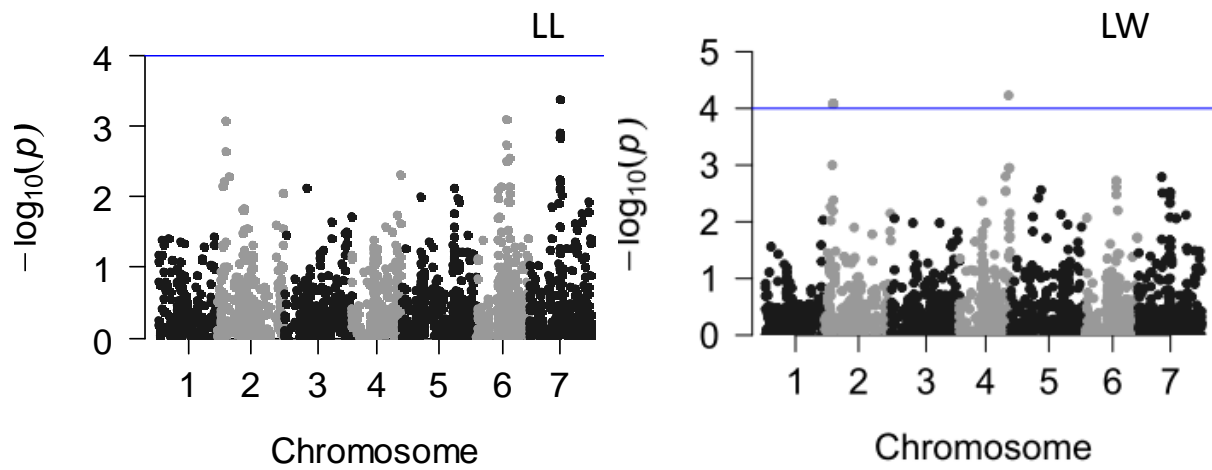

**Fig. S4** Manhattan plots of GWAS for leaf length (LL) and leaf width (LW) with flowering time (FD) as a covariate based on data of the barley cultivar collection scored in both locations. The  $-\log_{10}(p)$  values from the association scans are plotted against the SNP marker positions on each of the seven barley chromosomes. The dashed horizontal line indicates the genome-wide significance threshold at  $FDR < 0.05$ .

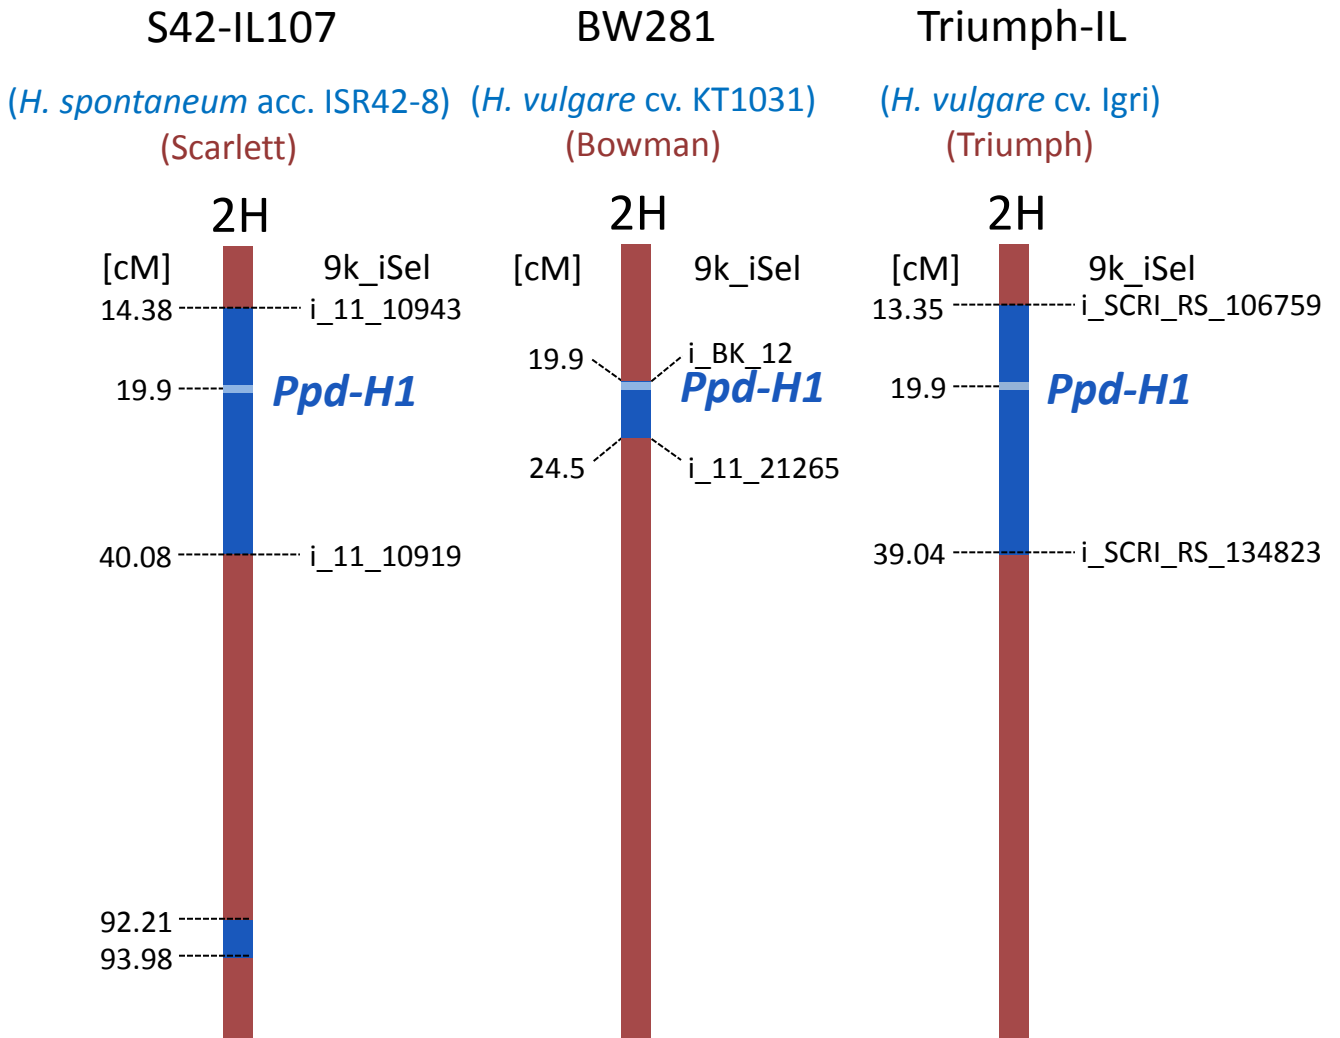

**Fig. S5** Size and flanking markers of *Ppd-H1* introgressions on chromosome 2H. Donor parents for the photoperiod-responsive *Ppd-H1* allele of the introgression lines and their respective spring barley background genotypes are indicated above each chart. Introgression lines were genotyped with the 9k iSelect chip from Illumina. Flanking marker positions of the introgressions are given relative to the POPSEQ map (Mascher *et al.*, 2013).

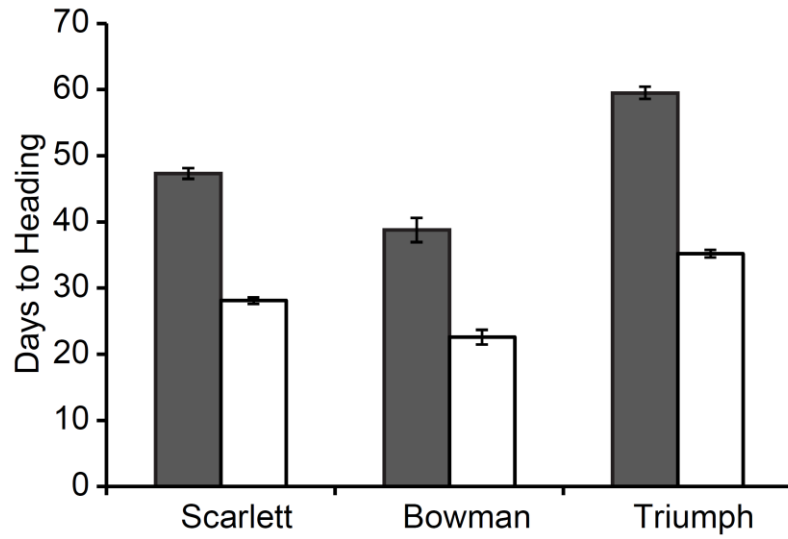

**Fig. S6** Heading date is delayed in the presence of the mutated *ppd-H1* allele under LDs. Heading date of three LD grown spring barley genotypes with the mutated *ppd-H1* allele (grey bars) and introgression lines for the photoperiod responsive *Ppd-H1* allele (white bars). Bars indicate means with 95%-confidence intervals.

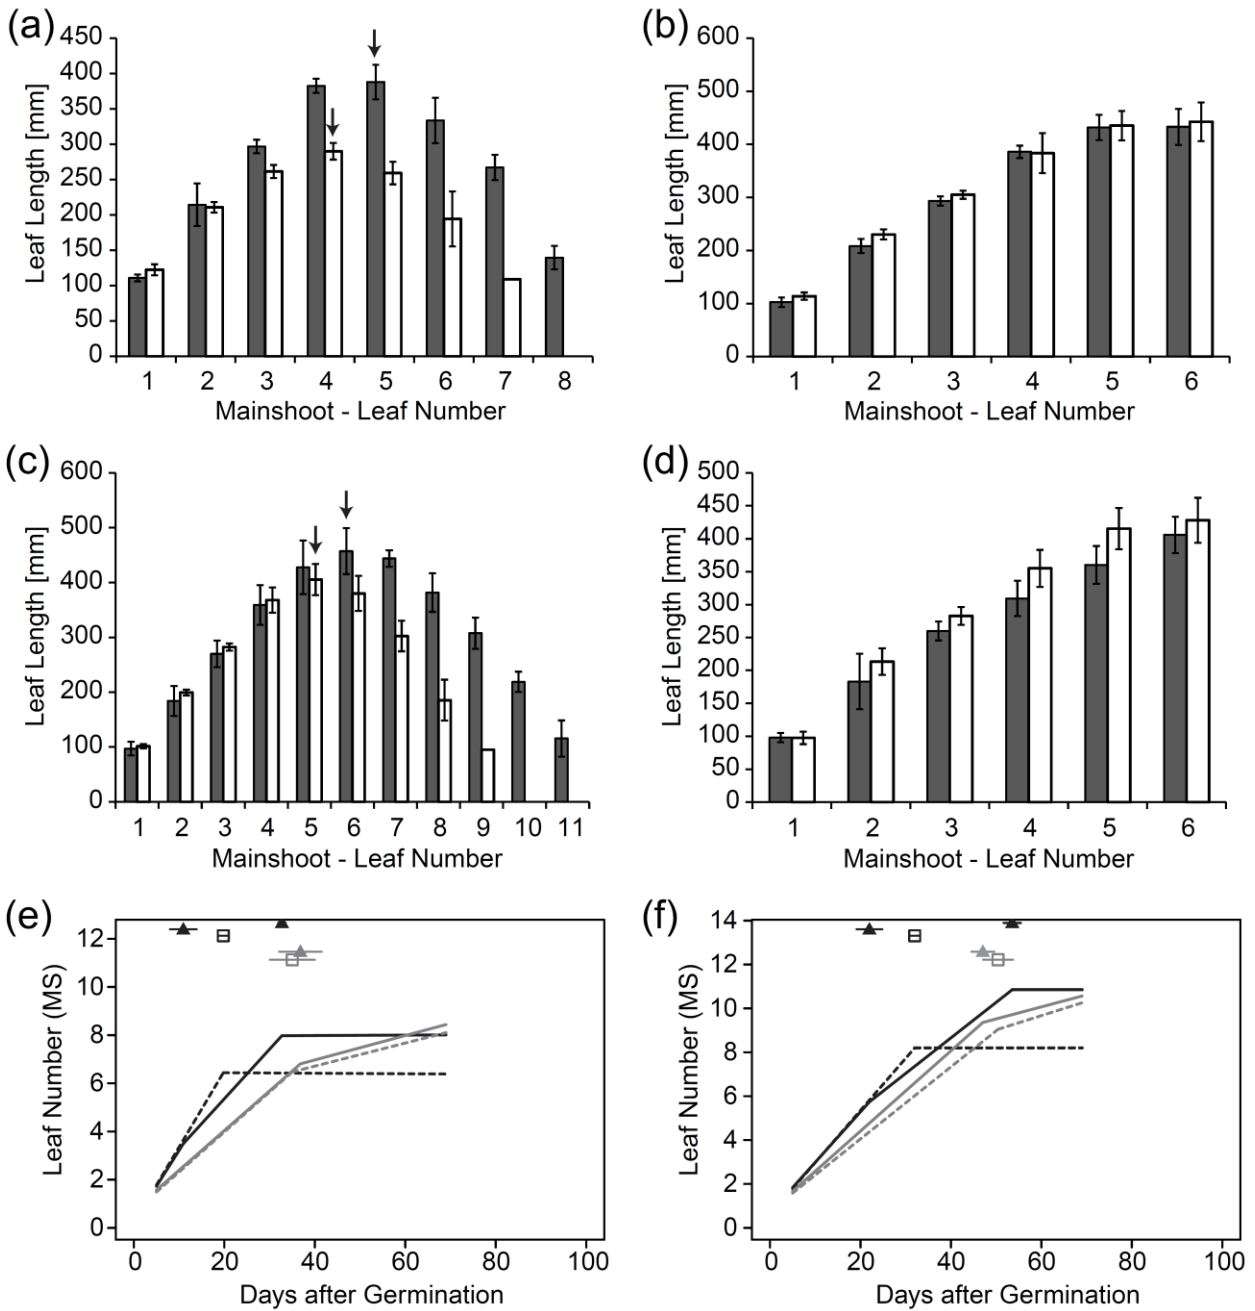

**Fig. S7** Leaf length and leaf emergence of Bowman/BW281 and Triumph/Triumph-IL. **(a-d)** Analysis of leaf length of every leaf on the main shoot of plants grown under **(a, c)** LD and **(b, d)** SD conditions. Leaf length and leaf emergence is shown for the genotypes **(a, b)** Bowman/BW281 and **(c, d)** Triumph/Triumph-IL with the spring barleys and introgression lines being represented by grey and white bars, respectively. Arrows indicate the longest leaf per genotype. Bars represent means with 95%-confidence intervals. **(e, f)** Number of leaves emerging from the leaf sheath per



time unit after germination in (e) Bowman/BW281 and (f) Triumph/Triumph IL, when spring barley genotypes (solid line, triangle) and introgression lines for the wild type *Ppd-H1* allele (dashed line, square) were grown under LDs (black) and SDs (grey). Breakpoints of the regression model and their 95%-confidence intervals are indicated for the different genotypes and conditions above the regression curves.

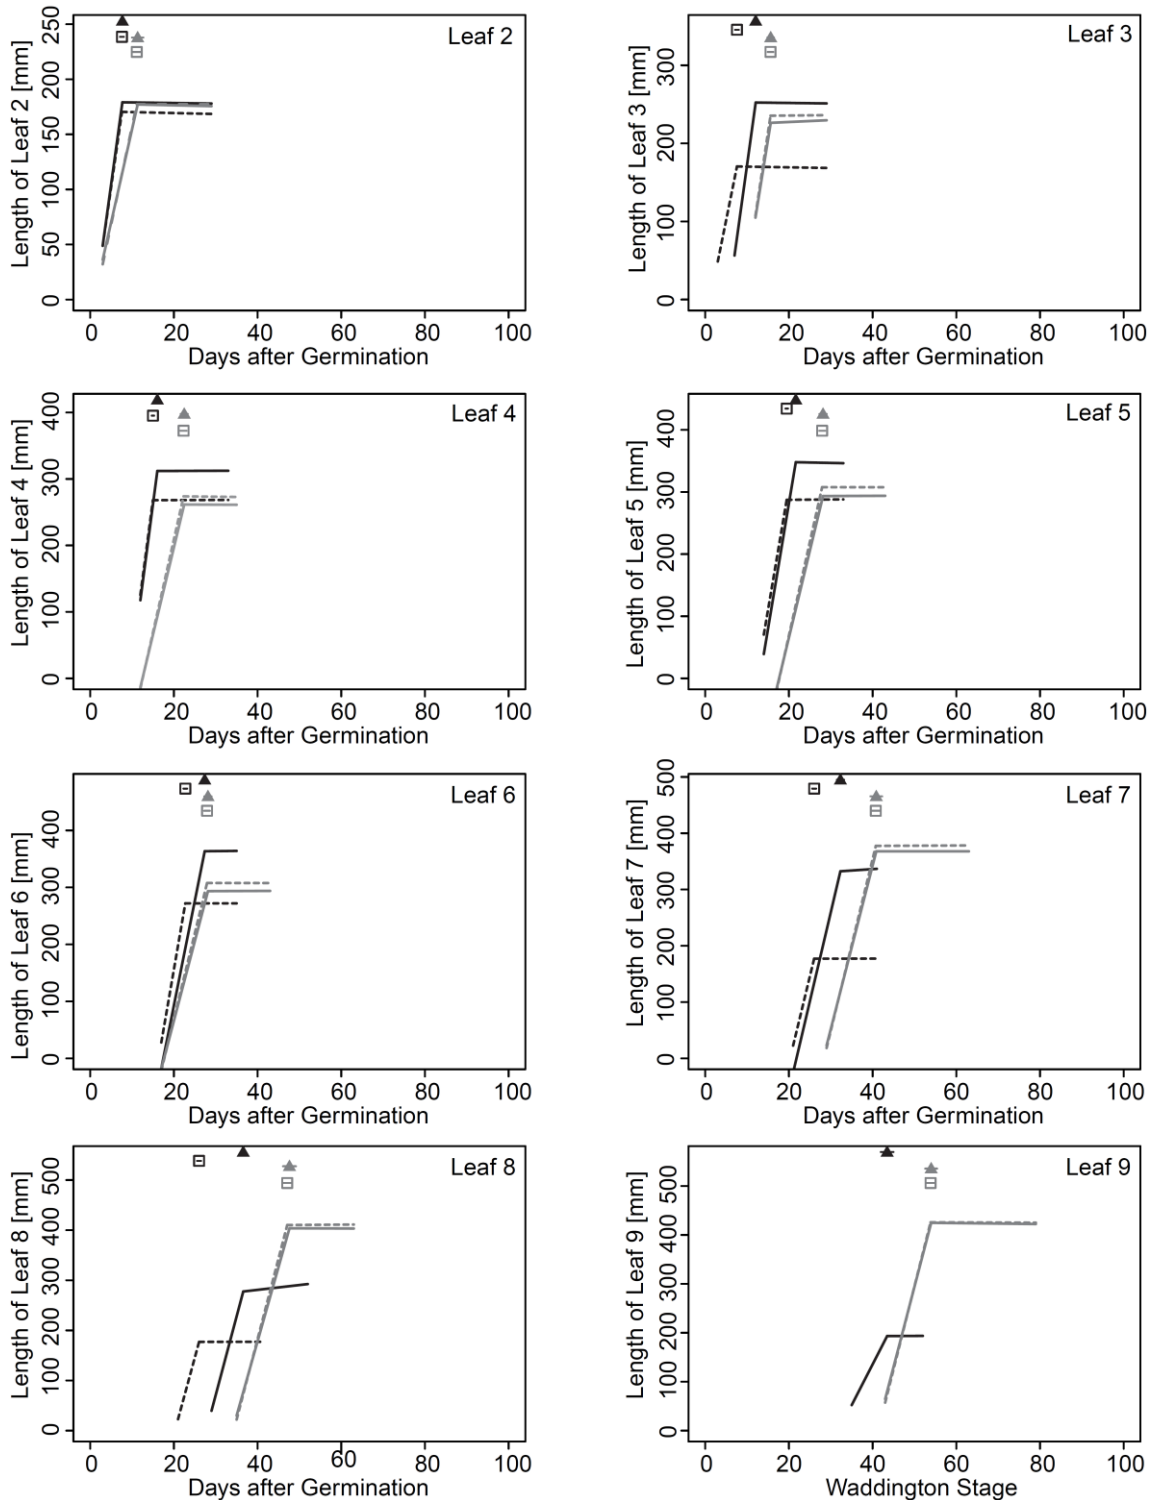

**Fig. S8** Variation at *Ppd-H1* does not affect the rate of leaf elongation. Leaf length was measured every three days under LDs (black) and every four days under SDs (grey) in Scarlett (solid line, triangle) and S42-IL107 (dashed line, square). Breakpoints of the regression model and their 95%-confidence intervals are indicated for the different genotypes and conditions above the regression curves.

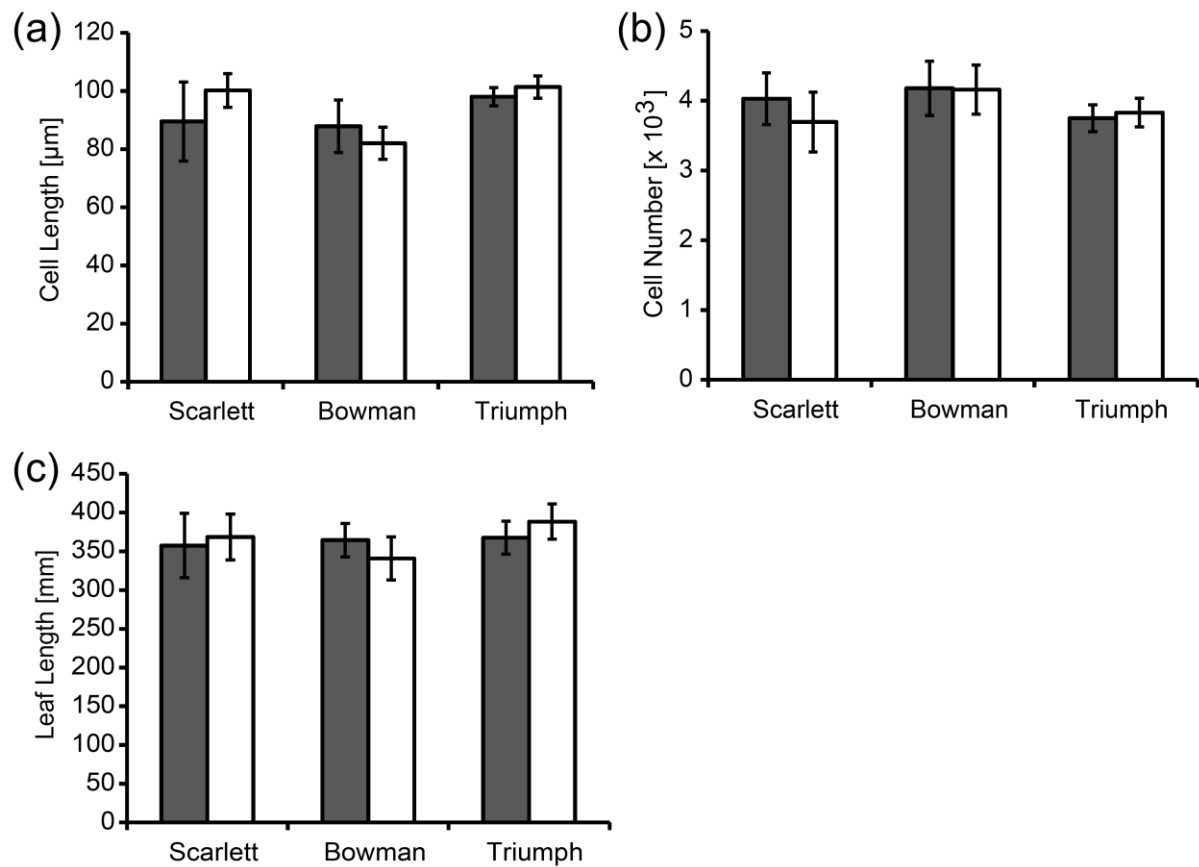

**Fig. S9** Leaf blade anatomy of the 5<sup>th</sup> leaf emerging from the main shoot of SD grown plants. **(a)** Cell length, **(b)** estimated cell number and **(c)** final leaf blade length of spring barley genotypes with the mutated *ppd-H1* allele (grey bars) as compared to their respective ILs with the photoperiod responsive *Ppd-H1* allele (white bars). Bars represent means  $\pm$  95%-confidence intervals (n=5).

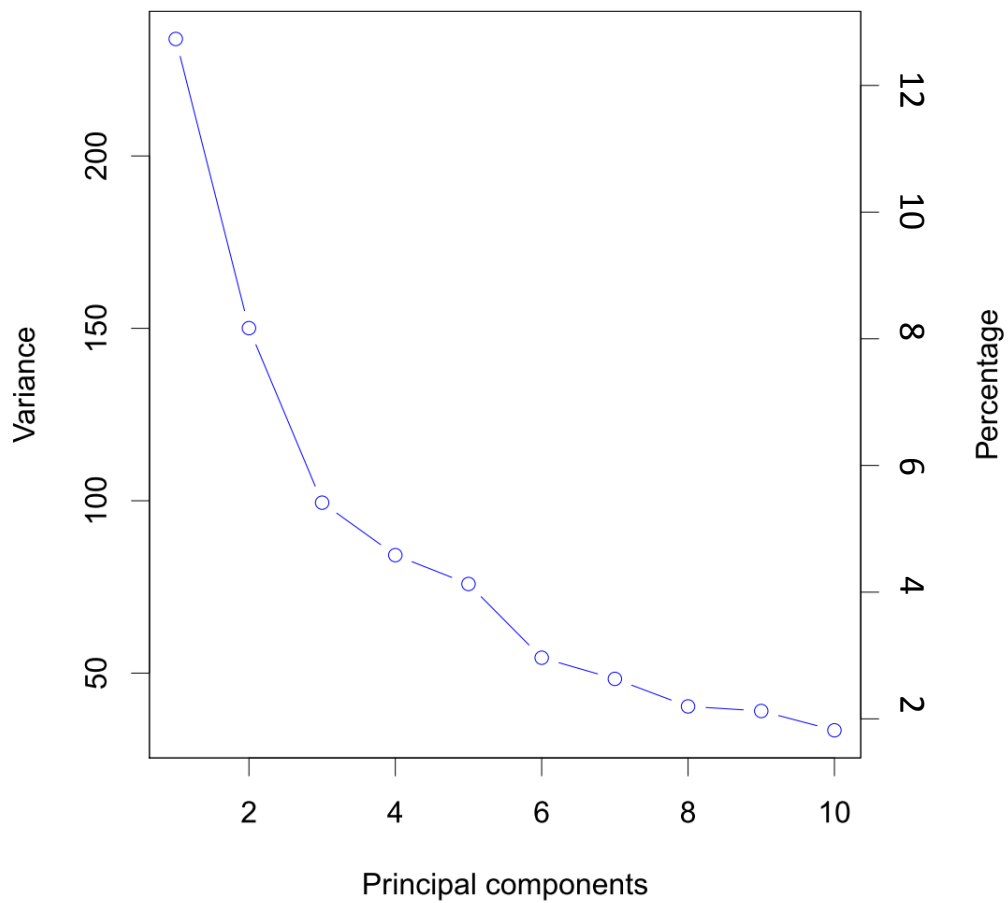

**Fig. S10** Variances and percentage of overall variance explained by the first 10 principal components. The first 3 components of the PCA explain collectively 24.1% of the phenotypic variation.

Table S1: Analysis of variance for flowering date (FD), leaf width (LW) and leaf length (LL).

| Factor                            | FD  |                 |                 |         |     |                 |                                  | LW  |      |      |         |     |                | LL                               |     |        |      |         |     |                |                                  |
|-----------------------------------|-----|-----------------|-----------------|---------|-----|-----------------|----------------------------------|-----|------|------|---------|-----|----------------|----------------------------------|-----|--------|------|---------|-----|----------------|----------------------------------|
|                                   | DF  | SS <sup>a</sup> | MS <sup>b</sup> | F value | Sig | R <sup>2c</sup> | R <sup>2</sup> <sub>Ppd-H1</sub> | DF  | SS   | MS   | F value | Sig | R <sup>2</sup> | R <sup>2</sup> <sub>Ppd-H1</sub> | DF  | SS     | M S  | F value | Sig | R <sup>2</sup> | R <sup>2</sup> <sub>Ppd-H1</sub> |
| A. Full interaction model         |     |                 |                 |         |     |                 |                                  |     |      |      |         |     |                |                                  |     |        |      |         |     |                |                                  |
| Genotype (G)                      | 137 | 11119           | 81              | 44      | *** | 0.82            |                                  | 137 | 2538 | 19   | 14      | *** | 0.31           |                                  | 137 | 113501 | 829  | 8.2     | *** | 0.80           |                                  |
| Environment (E)                   | 1   | 384             | 384             | 209     | *** | 0.03            |                                  | 1   | 4736 | 4736 | 3618    | *** | 0.58           |                                  |     |        |      |         |     |                |                                  |
| Replicate(E)                      | 4   | 128             | 32              | 17      | *** | 0.01            |                                  | 4   | 22   | 6    | 4       | **  | 0.00           |                                  | 2   | 1700   | 850  | 8.4     | *** | 0.01           |                                  |
| G*E                               | 129 | 993             | 8               | 4       | *** |                 |                                  | 137 | 174  | 1    | 1       | ns  |                |                                  |     |        |      |         |     |                |                                  |
| Residuals                         | 513 | 943             | 2               |         |     |                 |                                  | 537 | 703  | 1    |         |     |                |                                  | 269 | 27230  | 101  |         |     |                |                                  |
| B. Partitioning G+GE using Ppd-H1 |     |                 |                 |         |     |                 |                                  |     |      |      |         |     |                |                                  |     |        |      |         |     |                |                                  |
| Ppd-H1                            | 1   | 2563            | 2563            | 41      | *** |                 | 0.23                             | 1   | 137  | 137  | 8       | **  | 0.05           |                                  | 1   | 7337   | 7337 | 9.4     | **  |                | 0.06                             |
| Residual Genotype                 | 136 | 8556            | 63              | 8       | *** |                 |                                  | 136 | 2401 | 18   | 14      | *** |                |                                  | 136 | 106164 | 781  | 7.7     | *** |                |                                  |
| Ppd-H1*Env                        | 1   | 21              | 21              | 3       | ns  |                 |                                  | 1   | 4    | 4    | 3       | ns  |                |                                  |     |        |      |         |     |                |                                  |
| Residual Gen*Env                  | 128 | 972             | 8               | 4       | *** |                 |                                  | 136 | 170  | 1    | 1       | ns  |                |                                  |     |        |      |         |     |                |                                  |

<sup>a</sup> Sums of squares, MS= means square, <sup>c</sup>R<sup>2</sup> was calculated by dividing the sums of squares of the respective factor by the overall variation for the trait,  $R^2_{Ppd-H1} = SS_{Ppd-H1} / SS_g$

**Table S3** *Ppd-H1* haplotypes in the introgression lines

| SNP <sup>a</sup> | SNP <sup>b</sup> | Alleles | Position in AY943294.1 | iSelect Marker     | part of the gene | AA change  | Bowman | Scarlett | Triumph | BW821 | ISR42-8 S42-IL107 | Igri Triumph-IL | Winter barley collection:SNP associated with increase in LW and LL | Winter barley collectionSNP associated with decrease in LW and LL |
|------------------|------------------|---------|------------------------|--------------------|------------------|------------|--------|----------|---------|-------|-------------------|-----------------|--------------------------------------------------------------------|-------------------------------------------------------------------|
| SNP12            | 1                | G-C     | 51                     | BK_16              | exon PRR-domain  | Gln to His | G      | G        | G       | C     | C                 | C               | G                                                                  | C                                                                 |
| SNP41            | 12               | C-A     | 1843                   | 12_30870           | exon             | Asn to Lys | C      | C        | C       | A     | A                 | A               | C                                                                  | A                                                                 |
| SNP68            | 19               | G-A     | 2721                   | 12_30871 and BK_14 | exon             | Thr to Ala | A      | A        | A       | G     | G                 | G               | A                                                                  | G                                                                 |
| SNP79*           | 22               | G-T     | 3081                   | nd                 | exon CCT-domain  | Trp to Gly | T      | T        | T       | G     | G                 | G               | T                                                                  | G                                                                 |
| SNP81            | 23               | G-A     | 3114                   | BK_15              | exon CCT-domain  | Thr to Ala | A      | A        | A       | G     | G                 | G               | A                                                                  | G                                                                 |

<sup>a</sup> Number of polymorphism according to Jones et al. (2008), <sup>b</sup> number of polymorphism according to Turner et al. (2005), \* SNP associated with flowering time in Turner et al. (2005).

**Table S4** Variation at *Ppd-H1* affects the phyllochron

| <b>Photoperiod</b> | <b>Genotype</b> | <b>Leaf No.</b> | <b>Phyllochron<sup>1</sup><br/>[days]</b> | <b>95%-CI</b> |
|--------------------|-----------------|-----------------|-------------------------------------------|---------------|
| Long Day           | Bowman          | 1 - 3           | 3.4                                       | 2.7 - 4.0     |
|                    |                 | 4 - 8           | 4.9                                       | 4.7 - 5.1     |
|                    | BW281           | 1 - 7           | 3.2                                       | 2.8 - 3.5     |
|                    | Triumph         | 1 - 6           | 4.3                                       | 4.1 - 4.6     |
|                    |                 | 7 - 11          | 6.2                                       | 5.9 - 6.5     |
|                    | Triumph-IL      | 1 - 7           | 4.2                                       | 4.0 - 4.4     |
| Short Day          | Bowman          | 1 - 7           | 6.1                                       | 5.4 - 6.8     |
|                    |                 | 8 - 9           | 19.7                                      | 12.2 - 27.3   |
|                    | BW281           | 1 - 7           | 6.0                                       | 5.2 - 6.8     |
|                    |                 | 8 - 9           | 20.9                                      | 11.6 - 30.1   |
|                    | Triumph         | 1 - 9           | 5.5                                       | 5.2 - 5.7     |
|                    |                 | 10 - 11         | 18.2                                      | 12.1 - 24.3   |
|                    | Triumph-IL      | 1 - 9           | 6.1                                       | 5.9 - 6.3     |
|                    |                 | 10 - 11         | 15.4                                      | 9.7 - 21.0    |

<sup>1</sup> Phyllochron was calculated as the leaf emergence rate<sup>-1</sup> from the slopes of the linear segments of the regression lines presented in Fig. 4C, Fig. 3E and F.

**Table S5** Variation at *Ppd-H1* does not affect the rate of leaf blade elongation

| <b>Photoperiod</b> | <b>Genotype</b> | <b>Leaf No.</b> | <b>Leaf Blade Elongation<sup>1</sup><br/>[mm*day<sup>-1</sup>]</b> | <b>95%-CI</b> |
|--------------------|-----------------|-----------------|--------------------------------------------------------------------|---------------|
| Long Day           | Scarlett        | 2               | 27.7                                                               | 25.4 - 30.1   |
|                    |                 | 3               | 38.7                                                               | 36.5 - 40.9   |
|                    |                 | 4               | 48                                                                 | 40.2 - 55.8   |
|                    |                 | 5               | 40.4                                                               | 38.5 - 42.4   |
|                    |                 | 6               | 36.7                                                               | 35.2 - 38.2   |
|                    |                 | 7               | 31.6                                                               | 28.5 - 34.7   |
|                    |                 | 8               | 31.4                                                               | 28.2 - 34.6   |
|                    | 9               | 16.7            | 14.0 - 19.4                                                        |               |
|                    | S42-IL107       | 2               | 26.5                                                               | 23.7 - 29.4   |
|                    |                 | 3               | 33.2                                                               | 31.4 - 35.0   |
|                    |                 | 4               | 47.6                                                               | 42.0 - 53.1   |
|                    |                 | 5               | 39.6                                                               | 37.2 - 42.1   |
|                    |                 | 6               | 42.5                                                               | 38.7 - 46.3   |
|                    |                 | 7               | 30.7                                                               | 27.3 - 34.1   |
| Short Day          |                 | Scarlett        | 2                                                                  | 16.9          |
|                    | 3               |                 | 33.3                                                               | 24.8 - 41.8   |
|                    | 4               |                 | 26.2                                                               | 24.2 - 28.3   |
|                    | 5               |                 | 27.9                                                               | 25.5 - 30.4   |
|                    | 6               |                 | 22.6                                                               | 18.4 - 26.8   |
|                    | 7               |                 | 29.1                                                               | 25.1 - 33.0   |
|                    | 8               |                 | 29.6                                                               | 26.0 - 33.2   |
|                    | 9               | 32.8            | 29.2 - 36.3                                                        |               |
|                    | S42-IL107       | 2               | 17.9                                                               | 15.1 - 20.6   |
|                    |                 | 3               | 35.6                                                               | 27.9 - 43.4   |
|                    |                 | 4               | 28                                                                 | 26.2 - 29.8   |
|                    |                 | 5               | 30.1                                                               | 28.0 - 32.2   |
|                    |                 | 6               | 24.5                                                               | 21.2 - 27.8   |
|                    |                 | 7               | 30.5                                                               | 27.4 - 33.7   |
| 8                  |                 | 32              | 29.2 - 34.9                                                        |               |
| 9                  | 34              | 31.1 - 36.8     |                                                                    |               |

<sup>1</sup> Rate of leaf blade elongation calculated from the slopes of the regression line segments presented in Fig. 5a and Fig. S4.



**Table S6** Primers used for genotyping and Real Time qRT-PCR assays

| <b>Gene Name</b>                  | <b>GenBank ID</b> | <b>Marker Name</b>                | <b>Primer Sequence</b>                               | <b>Reference</b>    |
|-----------------------------------|-------------------|-----------------------------------|------------------------------------------------------|---------------------|
| <b><i>Genotyping</i></b>          |                   |                                   |                                                      |                     |
| <i>Vrn-H1</i>                     | AY785826.1        | HvBM5A-intronI-F3b                | 5'-CTTGCATGTGTTGTCGGTCT                              | Cockram et al. 2009 |
|                                   |                   | HvBM5A-intronI-R3b                | 5'-GCTGGGACAAGACTCTACGG                              |                     |
|                                   |                   | HvBM5A-intronI-F1<br>HvBM5A-TE-R1 | 5'-GTTCTCCACCGAGTCATGGT<br>5'-AGAGATGGAGGCATGGAGCA   |                     |
| <i>Vrn-H2</i>                     | DQ492699.1        | HvZCCT.HcF<br>HvZCCT.HcR          | 5'-CACCATCGCATGATGCAC<br>5'-TCATATGGCGAAGCTGGAG      | Karsai et al. 2005  |
|                                   |                   |                                   |                                                      |                     |
| <i>Ppd-H1</i>                     | AY970705.1        |                                   | 5'-ATGCGAATGGTGGATCGGC<br>5'-TATAGCTAGGTGCGTGGCG     | Turner et al. 2005  |
| <b><i>Expression Analysis</i></b> |                   |                                   |                                                      |                     |
| <i>Actin</i>                      | AK362208.1        |                                   | 5'-CGTGTTGGATTCTGGTGATG<br>5'-AGCCACATATGCGAGCTTCT   | Campoli et al. 2012 |
| <i>FT1</i>                        | DQ100327.1        |                                   | 5'-GGTAGACCCAGATGCTCCAA<br>5'-TCGTAGCACATCACCTCCTG   | Campoli et al. 2012 |
| <i>BM3</i>                        | AJ249143.1        |                                   | 5'-GCCGTCACCAGCACAAGCAA<br>5'-CCCCATTACCCTGTAGCAAAGA | Sasani et al. 2009  |
| <i>Vrn-H1</i>                     | AY785826.1        |                                   | 5'-CTGAAGGCGAAGGTTGAGAC<br>5'-TTCTCCTCCTGCAGTGACCT   | Campoli et al. 2012 |
| <i>BM8</i>                        | AJ249146.1        |                                   | 5'-GCACAGCAGCCGACACCTA<br>5'-TGCCTTTGGGGGAGAAGACG    | Sasani et al. 2009  |
